# Supplementary material
Source: publisher figshare collection journal article supplement (https://geolsoc.figshare.com/ndownloader/files/28010194)
Supplement: Supplementary file 1 [file 28010194]

## Sheet: Instructions
Instructions, EarthChem Data Submission Form for Authors
v2.1 last modified 6/18/2013
Thank you for submitting your data to EarthChem.
There are different Data Submission Forms, the different workbooks have different fields customized to the material analyzed and the method used.
Link to all Data Submission Forms
There are several tabs in this workbook to help catalog necessary metadata for our geochemical databases.
TABS
1 Data Source	Information to identify the dataset: title, author(s), creator (form-filler) Mandatory fields: Title, Author(s), Abstract, Contact Info
2 Samples	Information to identify, locate, and describe the samples, including IGSNs. Extra fields can be added. Mandatory fields: Sample name, IGSN, Latitude, Longitude, Elevation, Location keywords, Lithology
3 Data	The measured geochemical data values go here, along with basic information about how that value was derived (what was the material analyzed and what was done to it before the measurement?) Mandatory fields: Sample name, IGSN, Analyzed Material, Parameter(s), Method Code(s)
4 Primary Analytical Metadata	Information about the analytical procedure and accuracy and reproducibility, including technique, laboratory, and reference sample information. Mandatory fields: Method Code, Parameter, Technique, Laboratory, Reference Sample Name, Reference Sample Measured Value, Reference Uncertainty, Reference Uncertainty Unit, Number of Measurements
5 Method-specific Metadata	Information about detection limit, total procedural blank, normalization, fractionation (if applicable). Additional fields can be added.
6 Vocabularies	This tab contains the latest suggested vocabularies with date, and link to the live list on the EarthChem website.
Additional Comments:
1. Mandatory fields are labeled in boldface. The mandatory fields are the minimum requirements for the data to be entered into our searchable databases. The Editors' Roundtable document describes why certain data are necessary.
Editors' Roundtable Document
2. Longitude/Latitude should be reported in decimal degrees ideally to at least four decimal places (if the precision is that good), and negative values for South and West.
3. Vocabulary is linked where possible but we recommend seeing the complete up to date list and checking for newer updates.
EarthChem Vocabulary Page
4. To manipulate data in Excel, the 'Transpose' option is useful to transpose rows to columns or vice versa. Use "Paste Special" then check the box for Transpose.
5. More info about IGSNs (International Geo Sample Number) can be obtained at www.geosamples.org/aboutigsn
More info about the IGSN
6. The Method Code is a numerical value that links the column of measured values (Data Tab) with the Method information (Primary Analytical Metadata tab).
Contact Us:
Questions/Comments	info@earthchem.org
Send completed forms to:	info@earthchem.org
For more information about EarthChem	http://www.earthchem.org

## Sheet: 1 Data Source
Data Source Information		BOLD, CAPITAL headings indicate MANDATORY fields
Return to Instructions Tab
TITLE	descriptive title of the dataset	Major and trace element analyses of the Portge Lake volcanics from the Keweenaw CFBP
ABSTRACT	brief description of dataset, please aim for <250 words	This data set contains major and trace element analysis for a suite of basalts from the Portage Lake volcanics. The Portage Lake volcanics are a temporal sequence of flood basalts located in Northern Michigan that were deposited within the failed Midcontinent Rift. Major and trace elements were measured using XRF and LA-ICP-MS whole rock analysis. Major elements are reported in wt%, while trace e…
AUTHOR	name of the author(s) of the dataset (Last, First)	Davis, W. R., Collins, M. A., Rooney, T. O., Brown, E., Stein, C., Stein, S., and Moucha, R.
Institution	institution of the author
Release Date	date when the data is available to the public (if left blank, available now)	2022-02-19
Creator	person who fills out this template	William Ray Davis
CONTACT INFO	contact email for the creator of the template	davisw14@msu.edu
Related Publication #1	information about a publication related to the dataset (e.g. journal article that cites all or part of the dataset)
Title
Authors
Publication Year
Journal
Volume
Issue
Pages
DOI
Related Publication #2	information about a publication related to the dataset (e.g. journal article that cites all or part of the dataset)
Title
Authors
Publication Year
Journal
Volume
Issue
Pages
DOI
Fill more rows if necessary

## Sheet: 2 Samples
Sample Information			BOLD, CAPITAL headings indicate MANDATORY fields
Return to Instructions Tab
IDENTIFICATION		LOCATION				DESCRIPTION			More info (add more columns if you can provide more information)
SAMPLE NAME	IGSN	LATITUDE	LONGITUDE	ELEVATION	LOCATION KEYWORDS	LITHOLOGY	age	depth in core	texture	cruise	collection date	collector
name given by collector	unique ID assigned by SESAR	decimal degrees, negative to indicate S	decimal degrees, negative to indicate W	in meters with respect to sea level	keywords for searches ex.: East Pacific Rise, Sierra Nevada	rock type, e.g. basalt	age	depth in core, if applicable, in cm
		Please add columns for off-bottom locations if needed (e.g. for dredges)					age unit:
9550	TOR0000IJ	46.6235	-89.4986	476.098	Keweenaw, Midcontinent Rift	Basalt	Mesoproterozoic
9551A	TOR0000IK	46.6237	-89.4982	471.221	Keweenaw, Midcontinent Rift	Basalt	Mesoproterozoic
9551B	TOR0000IL	46.6237	-89.4982	471.221	Keweenaw, Midcontinent Rift	Basalt	Mesoproterozoic
9552	TOR0000IM	46.6238	-89.4972	483.108	Keweenaw, Midcontinent Rift	Basalt	Mesoproterozoic
9553	TOR0000IN	46.624	-89.4961	472.44	Keweenaw, Midcontinent Rift	Basalt	Mesoproterozoic
9554	TOR0000IO	46.6242	-89.4961	493.166	Keweenaw, Midcontinent Rift	Basalt	Mesoproterozoic
9555	TOR0000IP	46.6233	-89.4943	490.728	Keweenaw, Midcontinent Rift	Basalt	Mesoproterozoic
9556	TOR0000IQ	46.6229	-89.4937	481.279	Keweenaw, Midcontinent Rift	Basalt	Mesoproterozoic
9557A	TOR0000IR	46.6208	-89.4928	450.494	Keweenaw, Midcontinent Rift	Basalt	Mesoproterozoic
9557B	TOR0000IS	46.6208	-89.4928	450.494	Keweenaw, Midcontinent Rift	Basalt	Mesoproterozoic
9558	TOR0000IT	46.621	-89.4928	459.943	Keweenaw, Midcontinent Rift	Basalt	Mesoproterozoic
9559	TOR0000IU	46.6553	-89.449	368.503	Keweenaw, Midcontinent Rift	Basalt	Mesoproterozoic
9560	TOR0000IV	46.6518	-89.4461	459.638	Keweenaw, Midcontinent Rift	Basalt	Mesoproterozoic
9561	TOR0000IW	46.6564	-89.4467	395.935	Keweenaw, Midcontinent Rift	Basalt	Mesoproterozoic
9562	TOR0000IX	46.6565	-89.4467	403.86	Keweenaw, Midcontinent Rift	Basalt	Mesoproterozoic
9563	TOR0000IY	46.6569	-89.4477	401.117	Keweenaw, Midcontinent Rift	Basalt	Mesoproterozoic
9564	TOR0000IZ	46.6565	-89.4489	414.833	Keweenaw, Midcontinent Rift	Basalt	Mesoproterozoic
9565	TOR0000J0	46.656	-89.4494	396.85	Keweenaw, Midcontinent Rift	Basalt	Mesoproterozoic
9566	TOR0000J1	46.6574	-89.4488	402.031	Keweenaw, Midcontinent Rift	Basalt	Mesoproterozoic
9567	TOR0000J2	46.6574	-89.4502	416.966	Keweenaw, Midcontinent Rift	Basalt	Mesoproterozoic
9568	TOR0000J3	46.657	-89.4507	410.566	Keweenaw, Midcontinent Rift	Basalt	Mesoproterozoic
9569	TOR0000J4	46.6564	-89.4505	398.069	Keweenaw, Midcontinent Rift	Basalt	Mesoproterozoic
9574	TOR0000JD	46.6608	-89.3782	359.054	Keweenaw, Midcontinent Rift	Basalt	Mesoproterozoic
9575	TOR0000JE	46.6616	-89.3786	405.384	Keweenaw, Midcontinent Rift	Basalt	Mesoproterozoic
9576	TOR0000JF	46.6617	-89.379	432.511	Keweenaw, Midcontinent Rift	Basalt	Mesoproterozoic
9577	TOR0000JG	46.6613	-89.3796	446.227	Keweenaw, Midcontinent Rift	Basalt	Mesoproterozoic
9578	TOR0000JH	46.6616	-89.3795	453.542	Keweenaw, Midcontinent Rift	Basalt	Mesoproterozoic
9579	TOR0000JI	46.6617	-89.3807	466.039	Keweenaw, Midcontinent Rift	Basalt	Mesoproterozoic
9580	TOR0000JJ	46.662	-89.3801	468.782	Keweenaw, Midcontinent Rift	Basalt	Mesoproterozoic
9581	TOR0000JK	46.6622	-89.3801	472.135	Keweenaw, Midcontinent Rift	Basalt	Mesoproterozoic
9582	TOR0000JL	46.6627	-89.3795	468.782	Keweenaw, Midcontinent Rift	Basalt	Mesoproterozoic
9583	TOR0000JM	46.6627	-89.3812	459.638	Keweenaw, Midcontinent Rift	Basalt	Mesoproterozoic
9584	TOR0000JN	46.6613	-89.3839	437.388	Keweenaw, Midcontinent Rift	Basalt	Mesoproterozoic
9585	TOR0000JO	46.6613	-89.3845	444.094	Keweenaw, Midcontinent Rift	Basalt	Mesoproterozoic
9586	TOR0000JP	46.6617	-89.3848	451.714	Keweenaw, Midcontinent Rift	Basalt	Mesoproterozoic
9587	TOR0000JQ	46.6626	-89.3852	451.714	Keweenaw, Midcontinent Rift	Basalt	Mesoproterozoic
9588	TOR0000JR	46.6632	-89.3846	465.734	Keweenaw, Midcontinent Rift	Basalt	Mesoproterozoic
9589	TOR0000JS	46.6647	-89.3821	474.269	Keweenaw, Midcontinent Rift	Basalt	Mesoproterozoic
9590	TOR0000JT	46.6652	-89.3824	483.108	Keweenaw, Midcontinent Rift	Basalt	Mesoproterozoic
9591	TOR0000JU	46.665	-89.3839	483.718	Keweenaw, Midcontinent Rift	Basalt	Mesoproterozoic
9592	TOR0000JV	46.6651	-89.3859	482.194	Keweenaw, Midcontinent Rift	Basalt	Mesoproterozoic
9593	TOR0000JW	46.6655	-89.3867	474.269	Keweenaw, Midcontinent Rift	Basalt	Mesoproterozoic
9594	TOR0000JX	46.6668	-89.3857	472.135	Keweenaw, Midcontinent Rift	Basalt	Mesoproterozoic
9597	TOR0000K0	46.6699	-89.3872	454.152	Keweenaw, Midcontinent Rift	Basalt	Mesoproterozoic
9598	TOR0000K1	46.671	-89.3864	453.542	Keweenaw, Midcontinent Rift	Basalt	Mesoproterozoic
9599	TOR0000K2	46.6716	-89.386	446.532	Keweenaw, Midcontinent Rift	Basalt	Mesoproterozoic
9600	TOR0000K3	46.6724	-89.3864	450.19	Keweenaw, Midcontinent Rift	Basalt	Mesoproterozoic
9601	TOR0000K4	46.6728	-89.3858	447.142	Keweenaw, Midcontinent Rift	Basalt	Mesoproterozoic
9607	TOR0000K9	46.6733	-89.386	441.655	Keweenaw, Midcontinent Rift	Basalt	Mesoproterozoic
9608	TOR0000KA	46.6738	-89.3877	437.388	Keweenaw, Midcontinent Rift	Basalt	Mesoproterozoic
9609	TOR0000KB	46.6757	-89.383	450.19	Keweenaw, Midcontinent Rift	Basalt	Mesoproterozoic
9610	TOR0000KC	46.6767	-89.3792	467.563	Keweenaw, Midcontinent Rift	Basalt	Mesoproterozoic
9614	TOR0000KG	46.6592	-89.4269	370.027	Keweenaw, Midcontinent Rift	Basalt	Mesoproterozoic
9615	TOR0000KH	46.6572	-89.4258	372.77	Keweenaw, Midcontinent Rift	Basalt	Mesoproterozoic
9616	TOR0000KI	46.656	-89.4251	374.294	Keweenaw, Midcontinent Rift	Basalt	Mesoproterozoic

## Sheet: 3 Data
Analytical Data		BOLD, CAPITAL headings indicate MANDATORY fields
Return to Instructions Tab							PARAMETER [list]	SiO2	TiO2	Al2O3	Fe2O3T	MnO	MgO	CaO	Na2O	K2O	P2O5	LOI	Sc	V	Cr	Co	Ni	Rb	Sr	Y	Zr	Nb	Cs	Ba	La	Ce	Pr	Nd	Sm	Eu	Gd	Tb	Dy	Ho	Er	Tm	Yb	Lu	Hf	Ta	Pb	Th	U
							METHOD CODE [more info]:	1	1	1	1	1	1	1	1	1	1	2	1	1	1	1	1	1	1	1	1	1	1	1	1	1	1	1	1	1	1	1	1	1	1	1	1	1	1	1	1	1	1
							UNIT [list]:	WT%	WT%	WT%	WT%	WT%	WT%	WT%	WT%	WT%	WT%	WT%	PPM	PPM	PPM	PPM	PPM	PPM	PPM	PPM	PPM	PPM	PPM	PPM	PPM	PPM	PPM	PPM	PPM	PPM	PPM	PPM	PPM	PPM	PPM	PPM	PPM	PPM	PPM	PPM	PPM	PPM	PPM
SAMPLE NAME	IGSN	ANALYZED MATERIAL	species	size fraction	sample preparation	chemical treatment	number of replicates
must match a sample on the SAMPLES tab column A	must match an IGSN on the SAMPLES tab column B	e.g. whole rock, volcanic glass, mineral, fossil	if mineral or fossil e.g. plagioclase, Cibicidoides wuellerstorfi	e.g. <2mm	e.g. crushed in agate mill, sieved at 500 microns	e.g. whole rock samples were dissolved in 0.1M HF + 5.0M HNO3	if average, leave blank if 1
9550	TOR0000IJ	Whole rock						46.21	1.57	16.56	12.81	0.15	7.28	10.83	2.38	0.33	0.17	1.58	30.95	238	212.3	56.52	235.1	5.84	256.8	22.76	111	8.441	0.105	154.8	11.56	26.82	3.631	16.23	4.011	1.459	4.462	0.713	4.256	0.873	2.404	0.343	2.121	0.317	2.894	0.526	1.694	0.951	0.218
9551A	TOR0000IK	Whole rock						46.81	1.72	15.83	13.28	0.16	7.25	10.1	2.23	0.32	0.17	2.01	32.15	253.9	222.9	56.32	204.8	5.84	236.6	23.95	117.4	9.226	0.123	145.3	11.88	27.66	3.778	17.02	4.054	1.505	4.771	0.74	4.469	0.915	2.484	0.373	2.298	0.337	3.1	0.583	1.523	1.012	0.225
9551B	TOR0000IL	Whole rock						45.59	1.49	16.5	12.53	0.15	7.98	10.39	2.32	0.28	0.17	2.49	29.93	226.1	209.6	50.8	207.8	3.94	239.5	24.28	112.1	7.995	0.193	123.9	13.35	28.44	3.782	16.75	4.236	1.445	4.734	0.734	4.498	0.915	2.482	0.359	2.25	0.33	2.888	0.54	1.69	0.96	0.22
9552	TOR0000IM	Whole rock						46.47	1.52	15.91	13.46	0.16	6.98	10.68	2.21	0.29	0.16	2.04	29.94	234.3	232.7	47.36	213.1	4.46	240.4	22.37	107.3	8.364	0.179	125.7	11.79	27.07	3.695	16.36	3.966	1.495	4.495	0.714	4.304	0.876	2.38	0.351	2.187	0.311	2.901	0.538	1.712	0.962	0.216
9553	TOR0000IN	Whole rock						45.89	1.6	16.26	12.79	0.16	7.96	9.92	2.51	0.47	0.17	2.15	31.05	243	221.3	54.52	210	7.66	225.7	22.48	110	8.554	0.356	174.4	11.63	27.85	3.687	16.41	4.118	1.501	4.525	0.73	4.24	0.887	2.4	0.348	2.157	0.323	2.971	0.543	1.902	0.992	0.23
9554	TOR0000IO	Whole rock						47.26	1.67	16.2	13.28	0.18	7.13	10.22	2.35	0.31	0.16	1.12	32.88	242.8	228.7	54.92	215.8	5.56	254.8	23.67	112.6	8.765	0.292	127.9	11.71	27.44	3.765	16.73	4.04	1.556	4.628	0.732	4.413	0.907	2.45	0.365	2.317	0.335	3.048	0.574	1.654	0.974	0.22
9555	TOR0000IP	Whole rock						46.25	1.66	16.84	13.18	0.16	6.7	10.33	2.37	0.29	0.17	1.94	29.63	242	220.4	55.71	218.1	3.45	250.8	22.7	115.1	9.126	0.155	137.5	12.21	28.49	3.81	16.95	4.123	1.575	4.684	0.729	4.284	0.89	2.412	0.358	2.204	0.32	3.061	0.575	2.249	1.027	0.24
9556	TOR0000IQ	Whole rock						48.09	1.38	15.94	12.48	0.13	6.83	9.95	2.54	0.48	0.13	1.93	29.99	244.4	197.2	46.21	184.5	7.36	219.3	19.61	90	6.935	0.425	177.8	9.36	22.48	3.054	13.7	3.424	1.319	3.981	0.623	3.656	0.767	2.092	0.3	1.877	0.281	2.445	0.433	1.404	0.758	0.183
9557A	TOR0000IR	Whole rock						45.89	1.79	14.65	14.05	0.17	6.48	5.94	4.75	0.52	0.19	5.47	30.17	224.1	137	55.43	170.5	13.73	200.4	27.41	134.2	10.254	0.121	225.4	12.18	28.26	3.817	16.92	4.538	1.243	4.954	0.794	4.984	1.008	2.845	0.397	2.546	0.392	3.584	0.692	3.054	1.627	0.325
9557B	TOR0000IS	Whole rock						46.18	1.75	15.34	13.76	0.17	6.33	9.67	3.74	0.55	0.18	2.23	35.25	262.7	169.9	47.64	153.3	7.97	310.7	27.16	127.7	9.291	0.094	163.9	13	29.22	3.941	17.93	4.514	1.588	5.149	0.785	4.854	0.977	2.714	0.384	2.42	0.37	3.377	0.622	3.002	1.196	0.283
9558	TOR0000IT	Whole rock						46.49	1.62	16.11	13.21	0.16	7.98	9.9	2.18	0.29	0.16	1.79	31.25	241.9	195.6	58.37	206.6	5.62	233.6	24.13	112.4	8.156	0.149	123.5	11.38	26.92	3.591	15.95	3.957	1.45	4.456	0.703	4.358	0.872	2.402	0.345	2.193	0.332	2.94	0.503	2.069	1.012	0.24
9559	TOR0000IU	Whole rock						47.9	1.86	14.55	13.98	0.18	7.39	7.71	2.74	1.09	0.19	2.27	42.5	290.5	289.8	60.03	118.8	36.61	301.4	30.38	137.8	10.557	0.521	229.2	15.28	35.33	4.729	21.04	5.179	1.766	5.97	0.958	5.696	1.178	3.241	0.467	2.994	0.432	3.775	0.681	3.132	1.494	0.315
9560	TOR0000IV	Whole rock						43.98	1.67	15.98	13.52	0.2	13.64	1.8	3.83	0.47	0.17	4.65	30.34	188.3	142	80.35	219.1	7.69	34.8	19.01	108.8	9.05	0.058	106.8	8.35	20.87	2.854	12.63	3.309	0.976	3.76	0.619	3.896	0.764	2.072	0.323	1.979	0.287	2.933	0.594	1.113	0.916	0.27
9561	TOR0000IW	Whole rock						46.71	1.41	17.19	12.01	0.17	7.48	10.12	2.25	0.33	0.14	2.08	28.9	222.1	172.4	56.59	159.3	6.47	234.9	21.85	103.6	7.983	0.229	141.2	11.41	26.5	3.496	15.41	3.758	1.403	4.206	0.673	3.998	0.837	2.321	0.345	2.101	0.309	2.736	0.515	1.588	1.098	0.231
9562	TOR0000IX	Whole rock						45.6	1.39	16.92	12.01	0.16	8.16	10.37	2.04	0.27	0.14	2.82	32.23	220.8	194.3	57.14	164.9	5.28	213.5	22.21	100.7	7.232	0.276	112.8	10.43	23.58	3.167	14.27	3.627	1.27	4.203	0.653	4.004	0.818	2.23	0.318	2.029	0.306	2.596	0.465	1.323	0.944	0.198
9563	TOR0000IY	Whole rock						46.63	1.56	16.86	13.07	0.17	6.95	10.28	2.23	0.31	0.14	1.69	31.86	234.2	194.2	54.67	185.7	5.78	243.8	22.46	103.5	8.19	0.203	143	10.33	23.44	3.242	14.6	3.813	1.391	4.269	0.686	4.306	0.855	2.32	0.336	2.158	0.32	2.776	0.519	1.371	0.931	0.204
9564	TOR0000IZ	Whole rock						46.38	1.56	15.97	12.26	0.17	6.92	10.13	2.64	0.71	0.15	2.97	34.14	240.2	202.8	54.1	173.3	15.37	349.3	24.5	111.1	8.197	0.509	396.5	11.18	26.35	3.566	16.24	4.132	1.486	4.666	0.757	4.62	0.917	2.485	0.367	2.295	0.339	2.948	0.514	1.755	1.024	0.214
9565	TOR0000J0	Whole rock						46.58	1.56	16.42	12.81	0.17	7.58	10.17	2.19	0.27	0.15	1.98	34.22	236.6	190.1	54.91	171.7	4.57	237	23.72	106.5	8.176	0.226	113.1	11.09	25.09	3.474	15.7	3.957	1.472	4.483	0.735	4.594	0.896	2.511	0.366	2.28	0.342	2.86	0.528	1.406	1.002	0.226
9566	TOR0000J1	Whole rock						46.49	1.63	16.24	12.54	0.17	7.52	7.9	3.96	0.26	0.13	3.04	39.02	241.5	251.6	51.08	125.6	4.61	490.6	24.78	105.7	7.997	0.08	124.5	11.16	26.55	3.597	16.08	4.135	1.722	4.86	0.767	4.68	0.976	2.642	0.393	2.437	0.353	2.843	0.517	1.393	0.91	0.197
9567	TOR0000J2	Whole rock						46.41	1.52	16.1	13.01	0.16	7.81	10.66	2.1	0.21	0.14	1.79	33.95	239.5	210.4	54.09	180.3	4.33	219.2	23.47	101.7	7.726	0.08	99.7	9.71	23.08	3.141	14.24	3.74	1.364	4.296	0.672	4.216	0.861	2.366	0.329	2.155	0.324	2.754	0.489	1.097	0.844	0.196
9568	TOR0000J3	Whole rock						47.18	1.46	16.4	12.41	0.16	7.66	9.57	2.56	0.42	0.14	1.93	32.85	227.3	229.6	54.47	190.3	7.06	229	22.93	97.4	7.541	0.305	165.2	9.44	21.23	3.011	13.99	3.666	1.292	4.146	0.675	4.173	0.848	2.31	0.338	2.086	0.314	2.586	0.49	1.433	0.818	0.185
9569	TOR0000J4	Whole rock						46.82	1.58	16.25	12.43	0.17	7.46	10.87	2.16	0.27	0.14	1.73	33.79	252	238.5	53.3	169.1	5.22	230.6	23.38	103.3	8.232	0.239	92.7	10.28	24.34	3.31	15.02	3.923	1.413	4.428	0.714	4.392	0.889	2.443	0.349	2.217	0.33	2.776	0.512	1.123	0.888	0.197
9574	TOR0000JD	Whole rock						44.68	1.6	16.49	12.43	0.19	10.88	5.31	3.52	0.88	0.17	3.71	32.48	232.6	201.4	66.14	206.9	18.66	194.3	26.67	115.5	8.845	0.575	431.8	13.34	28.77	3.966	18.33	4.594	2.009	5.275	0.823	5.003	0.993	2.719	0.379	2.389	0.365	3.066	0.577	2.014	1.182	0.274
9575	TOR0000JE	Whole rock						47.1	1.77	15.65	12.29	0.16	6.94	7.54	3.62	1.75	0.18	2.83	32.08	240.6	144.9	51.41	144	45	275.7	27.77	135.3	9.774	0.889	599.1	14.06	31.42	4.237	18.88	4.748	1.494	5.274	0.808	5.034	1.011	2.813	0.39	2.55	0.38	3.521	0.641	1.449	1.44	0.324
9576	TOR0000JF	Whole rock						46.76	1.75	15.8	14.54	0.15	6.65	9.78	2.38	0.36	0.17	1.53	31.2	243.5	181	46.48	185.2	6.33	235.8	25.54	127.5	9.441	0.203	137.5	12.84	28.6	3.871	17.14	4.323	1.519	4.835	0.742	4.535	0.929	2.586	0.363	2.361	0.356	3.311	0.616	2.115	1.214	0.294
9577	TOR0000JG	Whole rock						46.7	1.75	16.43	12.89	0.17	6.98	9.21	2.72	0.81	0.18	2.06	31.22	238.8	149.7	49.86	161.6	23.96	210.6	26.59	129.5	9.611	0.495	215.6	13.45	30.31	3.968	17.99	4.491	1.5	4.955	0.762	4.754	0.963	2.634	0.378	2.399	0.361	3.392	0.611	1.803	1.312	0.31
9578	TOR0000JH	Whole rock						46.76	1.72	16.04	13.03	0.17	7.46	9.77	2.35	0.33	0.18	2.07	32.06	245.4	177.3	53.88	196.7	6.59	235.5	25.48	128.5	9.547	0.263	133.4	13.91	31.42	4.229	18.4	4.601	1.579	4.948	0.781	4.701	0.966	2.649	0.379	2.414	0.352	3.35	0.609	2.023	1.249	0.295
9579	TOR0000JI	Whole rock						47.46	1.77	15.92	13.39	0.16	7.18	9.16	2.49	0.48	0.18	1.7	32.35	257.2	177	55.39	194.8	10.97	210.5	25.24	128	9.612	0.632	151.5	14.03	35.09	4.52	19.16	4.616	1.702	4.953	0.791	4.649	0.952	2.663	0.383	2.464	0.345	3.238	0.571	1.963	1.266	0.285
9580	TOR0000JJ	Whole rock						46.46	1.73	15.79	13.38	0.16	7.38	8.06	2.82	1.21	0.19	2.69	31.05	234.6	167.3	55.12	186.2	35.82	175.6	25.76	127.4	9.565	0.6	362.3	13.18	29.66	3.95	17.69	4.432	1.427	4.917	0.768	4.651	0.945	2.611	0.37	2.371	0.357	3.356	0.621	1.773	1.283	0.306
9581	TOR0000JK	Whole rock						46.53	1.93	15.74	13.15	0.21	7.82	7.99	3.19	1.09	0.19	2.05	33.72	257.7	153.7	58.2	169.2	22.1	199.4	28.52	142.4	11.027	0.71	224.3	14.31	32.77	4.382	19.46	4.879	1.58	5.394	0.831	5.089	1.049	2.861	0.415	2.655	0.399	3.713	0.719	2.653	1.628	0.395
9582	TOR0000JL	Whole rock						46.46	1.6	16.29	13.11	0.17	7.52	9.92	2.27	0.31	0.16	2.07	30.86	249.6	177.4	57.75	212.9	6.51	234.4	21.79	105.3	8.189	0.36	114.7	11.65	29.14	3.733	16.27	3.982	1.473	4.279	0.676	4.127	0.842	2.303	0.33	2.127	0.313	2.749	0.48	1.768	0.949	0.221
9583	TOR0000JM	Whole rock						47.32	1.57	16.27	12.68	0.16	7.61	9.84	2.42	0.32	0.17	1.53	31.77	240.2	184	58.62	210.9	6.81	232.3	24.5	111.9	8.304	0.196	126.1	12.27	29.04	3.921	17.25	4.311	1.526	4.612	0.747	4.54	0.912	2.503	0.365	2.337	0.34	3.047	0.526	1.826	1.057	0.24
9584	TOR0000JN	Whole rock						47.01	1.82	16.19	13	0.16	6.76	8.3	2.94	1.42	0.18	2.1	33.79	254.5	154.3	50.72	145.2	27.13	216.8	27.55	133.3	9.837	0.494	266.4	13.73	29.71	4.134	18.17	4.584	1.546	5.195	0.813	4.905	1.002	2.787	0.404	2.537	0.372	3.398	0.643	1.794	1.333	0.326
9585	TOR0000JO	Whole rock						46.98	1.8	16.43	13.1	0.16	7.49	7.82	2.84	1.02	0.18	2.07	32.29	252.2	157.5	50.79	151.7	27.08	197.7	25.13	128.1	9.934	0.487	298.4	13.04	29.4	3.976	17.56	4.377	1.4	4.862	0.766	4.62	0.945	2.639	0.388	2.461	0.361	3.36	0.649	1.753	1.362	0.321
9586	TOR0000JP	Whole rock						46.63	1.75	15.81	13.34	0.16	7.42	8.52	2.75	0.97	0.18	2.34	31.21	244.8	176.4	54.9	197.7	20.91	195.6	25.76	126.8	9.653	0.599	251.1	12.9	29.66	4.004	17.94	4.512	1.522	5.001	0.765	4.708	0.961	2.648	0.376	2.403	0.353	3.334	0.637	2.204	1.251	0.291
9587	TOR0000JQ	Whole rock						46.1	1.69	16.14	13.08	0.18	8.03	10.28	2.23	0.3	0.16	1.7	32.04	251.9	189	59.74	205.3	4.94	233.8	23.28	111.5	8.564	0.122	125.9	11.59	26.24	3.591	16	3.993	1.436	4.501	0.724	4.333	0.909	2.458	0.362	2.254	0.332	2.954	0.574	1.712	1.007	0.227
9588	TOR0000JR	Whole rock						47.32	1.43	16.07	12.55	0.16	7.77	8.57	2.88	1.02	0.15	1.95	29.97	234	197.9	52.74	201.9	24.5	208.6	20.79	96.7	7.312	0.569	201.4	10.2	23.71	3.2	14.63	3.581	1.246	4.044	0.644	3.871	0.797	2.214	0.327	2.028	0.306	2.525	0.456	2.163	0.87	0.196
9589	TOR0000JS	Whole rock						46.52	1.62	16.52	13.39	0.16	7.16	9.91	2.37	0.33	0.17	1.73	30.36	238.5	211.2	56.81	220	6.37	237.3	23.08	111.7	8.706	0.165	128.7	12.13	27.87	3.781	16.82	4.132	1.491	4.516	0.722	4.351	0.87	2.411	0.352	2.208	0.314	2.904	0.544	1.781	0.966	0.23
9590	TOR0000JT	Whole rock						46.99	1.78	15.93	13.69	0.18	7.29	10	2.27	0.3	0.16	1.28	33.63	274.9	249	58.03	223.6	6.23	237.9	23	114.4	9.117	0.284	127.3	12.09	30.74	3.972	17.39	4.24	1.601	4.611	0.735	4.368	0.902	2.456	0.351	2.27	0.326	2.968	0.538	1.612	0.976	0.231
9591	TOR0000JU	Whole rock						45.05	1.61	16.51	12.69	0.15	7.71	10.83	2.43	0.32	0.17	2.43	32.08	253.4	231.3	63.08	222.8	6.86	226.7	23.65	115.6	8.741	0.359	128	12.39	32.33	4.182	18.33	4.473	1.635	4.601	0.755	4.475	0.914	2.521	0.349	2.308	0.33	3.036	0.52	1.755	1.06	0.235
9592	TOR0000JV	Whole rock						46.82	1.75	16.04	13.23	0.17	6.94	10.7	2.36	0.28	0.15	1.42	33.67	249.9	241.9	47.02	200.5	4.26	244.5	22.53	111.9	8.86	0.136	136.2	11.59	27.35	3.619	15.96	3.988	1.565	4.306	0.694	4.234	0.856	2.341	0.338	2.169	0.315	2.905	0.554	1.715	0.902	0.208
9593	TOR0000JW	Whole rock						46.39	1.66	15.63	13.53	0.17	8.02	9.94	2.19	0.29	0.17	1.9	32.46	246.5	205.4	58.96	217.4	6.27	229.3	24.41	116.1	8.993	0.237	125	11.94	26.85	3.68	16.62	4.283	1.541	4.67	0.763	4.637	0.924	2.514	0.361	2.32	0.337	3.067	0.572	1.454	1.008	0.23
9594	TOR0000JX	Whole rock						47.14	1.7	15.76	14.26	0.14	6.77	9.33	2.2	0.48	0.17	1.95	31.99	263.6	149.8	49.97	182.6	8.71	258.9	24.67	116.6	9.186	0.233	260.2	14.55	31.97	4.231	19.05	4.785	1.857	5.017	0.794	4.8	0.959	2.552	0.365	2.325	0.339	3.129	0.593	1.893	0.991	0.142
9597	TOR0000K0	Whole rock						46.89	1.59	16.15	12.29	0.16	6.74	9.06	3.68	0.43	0.16	2.74	31.82	222.8	161.3	51.47	180.5	8.16	234.8	25.5	119.6	8.686	0.312	147.6	12.65	28.57	3.914	17.34	4.379	1.65	4.902	0.748	4.546	0.918	2.544	0.369	2.322	0.34	3.073	0.555	1.699	1.099	0.246
9598	TOR0000K1	Whole rock						45.17	1.7	16.34	13.19	0.19	8.74	6.73	3.57	0.7	0.17	3.38	34.68	236.3	179.3	56.73	154.9	18.35	317.9	27.11	123.8	9.135	0.324	278.7	12.52	27.66	3.814	17.46	4.45	1.417	5.089	0.81	5.048	1.014	2.779	0.402	2.517	0.372	3.282	0.611	1.466	1.166	0.246
9599	TOR0000K2	Whole rock						47.35	1.39	16.9	11.47	0.16	7.23	10.74	2.24	0.32	0.14	1.95	33.41	214.6	239.7	52.38	159	6.94	241.5	23.17	101.9	7.579	0.185	143.8	10.46	23.22	3.187	14.5	3.715	1.314	4.271	0.679	4.167	0.845	2.319	0.337	2.122	0.32	2.694	0.493	1.4	0.98	0.213
9600	TOR0000K3	Whole rock						46.37	1.56	16.4	12.99	0.15	7.27	10.86	2.19	0.32	0.14	1.62	34.29	230.5	200.8	56.72	176.4	4.95	236.9	23.88	106.5	7.929	0.093	138.1	10.4	23.69	3.257	14.99	3.879	1.369	4.407	0.706	4.317	0.884	2.439	0.345	2.229	0.329	2.871	0.534	1.517	0.944	0.217
9601	TOR0000K4	Whole rock						47.02	1.64	16.46	12.15	0.18	7.16	10.87	2.25	0.31	0.15	1.69	36.57	252.7	228.2	49.54	142.9	5.77	234.8	24.71	108.5	8.447	0.101	115.1	10.19	23.37	3.26	15.18	3.831	1.461	4.617	0.752	4.683	0.945	2.58	0.369	2.365	0.351	2.959	0.569	1.264	0.922	0.215
9607	TOR0000K9	Whole rock						45.85	1.61	16.72	12.85	0.15	7.03	10.52	2.48	0.5	0.14	2.03	37.01	251.3	239	50.84	149.3	9.73	250.2	24.77	108.2	8.517	0.238	143.3	10.7	24.1	3.385	15.21	4.031	1.453	4.62	0.747	4.596	0.927	2.561	0.378	2.318	0.346	2.904	0.542	1.606	0.94	0.21
9608	TOR0000KA	Whole rock						46.96	1.53	16.34	12.76	0.17	7.63	10.07	2.21	0.26	0.14	1.81	34.39	243.4	200.5	56.11	171.5	4.56	226.6	23.91	101.6	7.944	0.113	94	10.24	23.7	3.309	14.79	3.959	1.404	4.465	0.725	4.498	0.898	2.518	0.36	2.276	0.332	2.746	0.51	1.141	0.916	0.208
9609	TOR0000KB	Whole rock						48.33	1.43	16	12.57	0.15	6.8	10.11	2.12	0.36	0.14	1.88	34.25	240.4	160.3	46.69	157.3	5.12	214.8	23.55	100.3	7.576	0.182	116.6	9.25	20.07	3.035	14.21	3.8	1.355	4.279	0.69	4.332	0.869	2.379	0.346	2.149	0.32	2.705	0.496	1.122	0.856	0.211
9610	TOR0000KC	Whole rock						45.11	1.23	17.08	11.42	0.16	9.52	9.19	2.6	0.42	0.11	3.04	33.44	235.9	320.8	55.97	238.6	6.13	215.4	22.07	82.4	6.17	0.246	138.3	8.71	20.07	2.804	12.9	3.408	1.334	4.057	0.641	3.952	0.813	2.184	0.314	1.985	0.296	2.213	0.404	0.96	0.686	0.148
9614	TOR0000KG	Whole rock						46.54	1.69	15.06	12.97	0.19	9.73	5.95	3.6	0.48	0.16	3.48	33.67	262.3	180.6	56.12	197.3	6.07	228.8	24.23	112.1	8.905	0.205	547.8	11.25	26.17	3.634	16.58	4.252	1.549	4.789	0.766	4.575	0.92	2.539	0.372	2.296	0.331	3.017	0.587	1.622	0.94	0.223
9615	TOR0000KH	Whole rock						46.19	1.48	16.41	12.87	0.14	7.72	10.71	2.31	0.25	0.14	1.67	33.47	254.2	206.1	53.68	219.2	4.29	254.9	21.56	96.8	7.335	0.353	115.2	9.73	22.04	3.058	14.12	3.711	1.377	4.165	0.651	4.068	0.814	2.229	0.321	2.04	0.292	2.605	0.493	1.278	0.782	0.182
9616	TOR0000KI	Whole rock						47.75	1.55	16.01	13.57	0.14	6.54	10.22	2	0.29	0.13	1.69	31.53	234.5	210.6	51.79	200.2	5.29	234.6	21.01	107.9	7.882	0.286	130	10.29	22.15	3.018	13.53	3.413	1.399	3.97	0.619	3.742	0.792	2.168	0.309	1.972	0.307	2.816	0.519	2.207	0.922	0.206

## Sheet: 4 Primary Analytical Metadata
Primary Analytical Metadata					BOLD, CAPITAL headings indicate MANDATORY fields
Return to Instructions Tab
FROM DATA TAB	Measured Parameter		ANALYTICAL PROCEDURE						ANALYTICAL ACCURACY & REPRODUCIBILITY					ANALYTICAL ACCURACY & REPRODUCIBILITY
METHOD CODE	PARAMETER		TECHNIQUE	instrument	LABORATORY	analyst	analysis date		REFERENCE SAMPLE NAME	REFERENCE SAMPLE MEASURED VALUE	REFERENCE UNCERTAINTY	REFERENCE UNCERTAINTY UNIT	NUMBER OF MEASUREMENTS	REFERENCE SAMPLE NAME	REFERENCE SAMPLE MEASURED VALUE	REFERENCE UNCERTAINTY	REFERENCE UNCERTAINTY UNIT	NUMBER OF MEASUREMENTS
must match a code in the DATA tab row 3	must match a parameter in the DATA tab row 2		[view list]	e.g. ThermoARL XRF, Agilent 7700 ICP-MS	e.g. Woods Hole Oceanographic Institute	name of analyst	MM/DD/YYYY		e.g. BCR-1		standard deviation	e.g. ppm, wt%	leave blank if 1	e.g. BCR-1		standard deviation	e.g. ppm, wt%	leave blank if 1
1	SiO2		XRF		Michigan State University, Michigan				JB1a	52.585	0.0403408	wt%	2	BHVO-1	49.655	0.0996828	wt%	2
1	TiO2		XRF		Michigan State University, Michigan				JB1a	1.275	0.554594	wt%	2	BHVO-1	2.725	0.259489	wt%	2
1	Al2O3		XRF		Michigan State University, Michigan				JB1a	14.485	0.0488165	wt%	2	BHVO-1	13.64	0	wt%	2
1	Fe2O3T		XRF		Michigan State University, Michigan				JB1a	9.025	0.235049	wt%	2	BHVO-1	12.225	0.057841	wt%	2
1	MnO		XRF		Michigan State University, Michigan				JB1a	0.15	0	wt%	2	BHVO-1	0.17	0	wt%	2
1	MgO		XRF		Michigan State University, Michigan				JB1a	7.85	0	wt%	2	BHVO-1	7.175	0.0985515	wt%	2
1	CaO		XRF		Michigan State University, Michigan				JB1a	9.345	0.0756669	wt%	2	BHVO-1	11.325	0.187313	wt%	8
1	Na2O		XRF		Michigan State University, Michigan				JB1a	2.78	0.50871	wt%	2	BHVO-1	2.205	0.320683	wt%	2
1	K2O		XRF		Michigan State University, Michigan				JB1a	1.43	0	wt%	2	BHVO-1	0.52	0	wt%	2
1	P2O5		XRF		Michigan State University, Michigan				JB1a	0.26	0	wt%	2	BHVO-1	0.27	0	wt%	2
1	Sc		ICP:MS-LA		Michigan State University, Michigan				JB1a	28.0973	0.00854949	ppm	30	BHVO-1	31.3103	0.0138736	ppm	31
1	V		ICP:MS-LA		Michigan State University, Michigan				JB1a	197.629	0.0142854	ppm	30	BHVO-1	310.246	0.0150559	ppm	31
1	Cr		ICP:MS-LA		Michigan State University, Michigan				JB1a	414.509	0.00999941	ppm	30	BHVO-1	286.488	0.016614	ppm	31
1	Co		ICP:MS-LA		Michigan State University, Michigan				JB1a	38.6068	0.00520211	ppm	30	BHVO-1	44.4833	0.00758178	ppm	31
1	Ni		ICP:MS-LA		Michigan State University, Michigan				JB1a	143.946	0.00319107	ppm	30	BHVO-1	119.794	0.00782771	ppm	31
1	Rb		ICP:MS-LA		Michigan State University, Michigan				JB1a	38.5404	0.00839048	ppm	30	BHVO-1	9.27205	0.0115859	ppm	31
1	Sr		ICP:MS-LA		Michigan State University, Michigan				JB1a	448.298	0.0058094	ppm	30	BHVO-1	397.714	0.00288935	ppm	31
1	Y		ICP:MS-LA		Michigan State University, Michigan				JB1a	22.4601	0.0174167	ppm	30	BHVO-1	25.7628	0.01768	ppm	31
1	Zr		ICP:MS-LA		Michigan State University, Michigan				JB1a	136.771	0.0101035	ppm	30	BHVO-1	170.373	0.0134295	ppm	31
1	Nb		ICP:MS-LA		Michigan State University, Michigan				JB1a	28.2432	0.00884703	ppm	30	BHVO-1	18.5672	0.00628691	ppm	31
1	Cs		ICP:MS-LA		Michigan State University, Michigan				JB1a	1.21817	0.0229869	ppm	30	BHVO-1	0.0955209	0.0466157	ppm	31
1	Ba		ICP:MS-LA		Michigan State University, Michigan				JB1a	500.689	0.00431775	ppm	30	BHVO-1	132.797	0.00882408	ppm	31
1	La		ICP:MS-LA		Michigan State University, Michigan				JB1a	37.9941	0.00281087	ppm	30	BHVO-1	15.4431	0.00776654	ppm	31
1	Ce		ICP:MS-LA		Michigan State University, Michigan				JB1a	66.903	0.0137005	ppm	30	BHVO-1	38.1653	0.00503581	ppm	31
1	Pr		ICP:MS-LA		Michigan State University, Michigan				JB1a	7.15033	0.00379419	ppm	30	BHVO-1	5.38431	0.00983752	ppm	31
1	Nd		ICP:MS-LA		Michigan State University, Michigan				JB1a	26.3914	0.00305569	ppm	30	BHVO-1	24.5967	0.00908095	ppm	31
1	Sm		ICP:MS-LA		Michigan State University, Michigan				JB1a	5.08295	0.0135391	ppm	30	BHVO-1	6.13188	0.0104362	ppm	31
1	Eu		ICP:MS-LA		Michigan State University, Michigan				JB1a	1.49609	0.0156564	ppm	30	BHVO-1	2.06225	0.0240425	ppm	31
1	Gd		ICP:MS-LA		Michigan State University, Michigan				JB1a	4.82899	0.00266768	ppm	30	BHVO-1	6.3194	0.00670234	ppm	31
1	Tb		ICP:MS-LA		Michigan State University, Michigan				JB1a	0.711137	0.0112177	ppm	30	BHVO-1	0.933622	0.0193869	ppm	31
1	Dy		ICP:MS-LA		Michigan State University, Michigan				JB1a	4.1419	0.0134647	ppm	30	BHVO-1	5.28012	0.0149547	ppm	31
1	Ho		ICP:MS-LA		Michigan State University, Michigan				JB1a	0.820261	0.00931596	ppm	30	BHVO-1	0.990777	0.0123953	ppm	31
1	Er		ICP:MS-LA		Michigan State University, Michigan				JB1a	2.22853	0.00678691	ppm	30	BHVO-1	2.50463	0.0104009	ppm	31
1	Tm		ICP:MS-LA		Michigan State University, Michigan				JB1a	0.327003	0.00880173	ppm	30	BHVO-1	0.337296	0.0254576	ppm	31
1	Yb		ICP:MS-LA		Michigan State University, Michigan				JB1a	2.08774	0.0016259	ppm	30	BHVO-1	2.01062	0.006885	ppm	31
1	Lu		ICP:MS-LA		Michigan State University, Michigan				JB1a	0.308323	0.0100389	ppm	30	BHVO-1	0.280811	0.00759176	ppm	31
1	Hf		ICP:MS-LA		Michigan State University, Michigan				JB1a	3.53902	0.00857037	ppm	30	BHVO-1	4.47599	0.00588955	ppm	31
1	Ta		ICP:MS-LA		Michigan State University, Michigan				JB1a	1.81086	0.0107615	ppm	30	BHVO-1	1.22803	0.00845399	ppm	31
1	Pb		ICP:MS-LA		Michigan State University, Michigan				JB1a	6.58209	0.013691	ppm	30	BHVO-1	2.09691	0.0245522	ppm	31
1	Th		ICP:MS-LA		Michigan State University, Michigan				JB1a	9.20229	0.0071659	ppm	30	BHVO-1	1.23739	0.0150702	ppm	31
1	U		ICP:MS-LA		Michigan State University, Michigan				JB1a	1.6063	0.00636603	ppm	30	BHVO-1	0.409361	0.0139338	ppm	31

## Sheet: 5 Method-specific Metadata
Method-specific Metadata									for bulk sample elemental data
Return to Instructions Tab
FROM DATA TAB	Measured Parameter		DETECTION LIMIT			TOTAL PROCEDURAL BLANK			NORMALIZATION
METHOD CODE	PARAMETER		detection limit	unit		blank value	unit		reference sample name	reference sample accepted value	citation
must match a code in the DATA tab row 3	must match a parameter in the DATA tab row 2			e.g. ppm			e.g. ppm		if applicable	i.e. from the literature	e.g. USGS
1	SiO2			wt%
1	TiO2			wt%
1	Al2O3			wt%
1	Fe2O3T			wt%
1	MnO			wt%
1	MgO			wt%
1	CaO			wt%
1	Na2O			wt%
1	K2O			wt%
1	P2O5			wt%
1	Sc		0.2	ppm
1	V		0.0766667	ppm
1	Cr		0.3	ppm
1	Co		0.05	ppm
1	Ni		0.3	ppm
1	Rb		0.0866667	ppm
1	Sr		0.0866667	ppm
1	Y		0.02	ppm
1	Zr		0.04	ppm
1	Nb		0.00766667	ppm
1	Cs		0.0133333	ppm
1	Ba		0.0866667	ppm
1	La		0.00766667	ppm
1	Ce		0.0133333	ppm
1	Pr		0.00366667	ppm
1	Nd		0.0163333	ppm
1	Sm		0.01	ppm
1	Eu		0.00266667	ppm
1	Gd		0.00966667	ppm
1	Tb		0.002	ppm
1	Dy		0.005	ppm
1	Ho		0.002	ppm
1	Er		0.003	ppm
1	Tm		0.00133333	ppm
1	Yb		0.00466667	ppm
1	Lu		0.00166667	ppm
1	Hf		0.00433333	ppm
1	Ta		0.002	ppm
1	Pb		0.0166667	ppm
1	Th		0.00166667	ppm
1	U		0.002	ppm

## Sheet: 6 Vocabularies
Vocabularies
This tab contains the suggested Vocabularies for EarthChem Data Submissions: Parameter, Technique, Unit. Please scroll to the right to see the entire page
The EarthChem Vocabularies are maintained at http://www.earthchem/resources/vocabularies
Contact us with questions or additions: info@earthchem.org
Last modified: 21 Apr 2014
Parameter	Parameter Description		Technique	Technique Description		Unit	Unit Description		Mineral Code	Mineral Description
AB	albite		14C	CARBON 14 AGE DETERMINATION		%	percent		AB	ALBITE
AC	acmite		AA	ACTIVATION ANALYSIS		age	age		ACC	ACCESSORY MINERALS
ACC	accessory minerals		AAS	ATOMIC ABSORPTION		atoms/g	atoms per gram		ACT	ACTINOLITE
ACETATE	acetate		AGE:ASSIG	Assigned Sample Age		bar	bar		ACT-HORN	ACTINOLITIC HORNBLENDE
ACT	actinolite		AGE:GEO	Geological Sample Age		CC	cubic centimeter		AEG	AEGIRINE
ACT-HORN	actinolitic hornblende		ALPHA	ALPHA COUNTING		cc/g	cubic centimeters per gram		AL-SAP	ALUMINUM SAPONITE
AEG	aegirine		ALPHA-ID	ALPHA COUNTING ISOTOPE DILUTION		ccstp	cubic centimeters at standard temperature and pressure		ALLA	ALLANITE
Ag	silver		AMS	ACCELERATOR MASS SPECTROMETRY		ccstp/g	cubic centimeters at standard temperature and pressure per gram		ALT	ALTERATION PRODUCT
Age	sample age		ANC	ANION CHROMATOGRAPHY		cm	centimeter		AM-SI	AMORPHOUS SILICA
AI	age item		AR_AR	AR40_AR39 AGE DETERMINATION		cps/g	counts per second/gram		AMES	AMESITE
Al	aluminum		ARC	ARC SPECTROMETRY		degrees C	degrees Celsius		AMPH	AMPHIBOLE
Al2O3	aluminium oxide		AUT	AUTO ANALYZER		dpm	disintegrations per minute		AN	ANORTHITE
ALK	alkalinity		AUTLCH	AUTOMATED LEACHING		dpm/g	disintegrations per minute per gram		ANAL	ANALCITE
ALKENONE	alkenone		BOMB	CARBONATE BOMB		fg/g	femptograms per gram		ANALC	ANALC
ALLA	allanite		CALC	CALCULATED		Ga	billion years ago		ANCL	ANORTHOCLASE
ALM	almandine		CCP	CALCIUM CARBONATE PRESERVATION		GPa	gigapascal		ANH	ANHYDRITE
AL-SAP	aluminum saponite		CHN	CARBON HYDROGEN NITROGEN ANALYSIS		ka	thousand years ago		ANOR	ANORTHOSITE
ALT	alteration product		CHN-G	CHN GAS CHROMATOGRAPHY		KBAR	kilobar		APA	APATITE
AMES	amesite		CHS	CARBON HYDROGEN SULFUR ELEMENTAL ANALYZER		km	kilometer		ARA	ARAGONITE
AMG	amygdule		CMBN	COMBUSTION		m	meter		ARMA	ARMALCOLITE
AMPH	amphibole		CNS	CARBON NITROGEN SULFUR ANALYZER		Ma	million years ago		AUG	AUGITE
AM-SI	amorphous silica		COL	COLORIMETRIC ANALYSIS		meq/kg	milliequivalent per kilogram		AWA	AWARUITE
AN	anorthite		COUL	COULOMETRICAL ANALYSIS		micromol	micromol		BIO	BIOTITE
ANAL	analcite		CSA	CARBON SULFUR ANALYSIS		micron	micron		BST	BST
ANCL	anorthoclase		DCP	DIRECT CURRENT PLASMA (FURTHER DETAIL NOT PROVIDED)		millimol	millimol		BZT	BRONZITE
AND	andalusite		DCP-AES	DIRECT CURRENT PLASMA ATOMIC EMISSION SPECTROMETRY		MLSTP/G	milliliters per gram at standard temperature and pressure		CALC	CALCITE
ANDR	andradite		DROES	DIRECT READING OPTICAL EMISSIONS SPECTROSCOPY		mm	millimeter		CARB	CARBONATE
ANH	anhydrite		EA	ELEMENTAL ANALYSIS		mmol/kg	millimol per kilogram		CASU	CALCIUM SULFATE
ANOR	anorthosite		EA-CF-IRMS	ELEMENTAL ANALYZER-CONTINUOUS FLOW ISOTOPE RATIO MASS SPECTROMETRY		mmol/L	millimol per liter		CATS	CaAl(AlSiO6)
APA	apatite		EMP	ELECTRON MICROPROBE		mol	mol		CCR	CaCr(AlSiO6)
Ar	argon		ENAA	EPITHERMAL NEUTRON ACTIVATION ANALYSIS		mol%	mol percent		CEL	CELADONITE
Ar36	argon isotope ar36		ES	EMISSION SPECTROMETRY		mol/g	moles per gram		CEL-NON	CELADONITE-NONTRONITE
Ar36_Ar38	ratio of argon isotopes ar36 to ar38		FIS	FISSION TRACK		Mpa	megapascal		CEL-NON-SAP	CELADONITE-NONTRANITE-SAPONITE
Ar36_Ar40	ratio of argon isotopes ar36 to ar40		FL-ES	FLAME EMISSION SPECTROSCOPY		nanomol	nanomol		CHL	CHL
Ar37_Ar40	ratio of ar37 to ar40		FP	FILM POLAROGRAPHY		nccstp/g	nanocubic centimeters per gram at standard temperature and pressure		CHL/SMEC	CHLORITE/SMECTITE
Ar38	argon isotope ar38		FPHOT	FLAME PHOTOMETRY		ng/g	nanograms per gram		CHLOR	CHLORITE
Ar38_Ar36	ratio of argon isotopes ar38 to ar36		FTIR	FOURIER TRANSFORM INFRARED SPECTROMETRY		per mil	parts per thousand		CHLOR-SAP	CHLORITE-SAPONITE
Ar39	argon isotope ar39		GAMMA	GAMMA COUNTING		per mil CDT	parts per thousand relative to CDT (Canon Diablo Troilite)		CHROM	CHROMITE
Ar39_Ar40	ratio of argon isotopes ar39 to ar40		GC	GAS CHROMATOGRAPHY		per mil SMOW	parts per thousand relative to SMOW (Standard Mean Ocean Water)		CHRYS	CHRYSOTILE
Ar40	argon isotope ar40		GC-MS	GAS CHROMATOGRAPHY- MASS SPECTROMETRY		ppb	parts per billion		CLAY	CLAY
Ar40*	radiogenic ar40		GF-AAS	GRAPHITE FURNACE ATOMIC ABSORPTION SPECTROMETRY		ppm	parts per million		CLS	CELESTINE
Ar40_Ar36	ratio of argon isotopes ar40 to ar36		GIO	GRADIENT ION-CHROMATOGRAPHY		ppm (atomic)	parts per million on atomic scale		CLY	CLAY MINERAL
Ar40_Ar36(I)	initial ar40 to ar36 ratio		GL-EL	GLASS ELECTRODE		ppt	parts per thousand		CMG	CUMMINGTONITE
Ar40_Ar39	ratio of argon isotopes ar40 to ar39		GRAV	GRAVIMETRY		umol	micromol		COR	CORUNDUM
Ar40_ATM	atmospheric argon isotope ar40		GS	GASOMETRIC TECHNIQUE		umol/g	micromoles per gram		CORD	CORDIERITE
Ar40_He4	ratio of argon isotopes ar40 to helium isotope he4		HPLC	HIGH-PERFORMANCE LIQUID CHROMATOGRAPHY		vol%	volume percent		CORR	CORRENSITE
Ar40_RG	radiogenic ar40		HR-ICP-MS	HIGH-RESOLUTION INDUCTIVELY COUPLED PLASMA MASS SPECTROMETRY		vs ATMOS	relative to the atmosphere		CPX	CLINOPYROXENE
Ar40RG_Ar39K	ratio of radiogenic ar40 to ar39 produced from k		IA	IMAGE ANALYSIS		vs CDT	relative to CDT (Canon Diablo Troilite)		CPY	CHALCOPYRITE
ARA	aragonite		ICP	INDUCTIVELY COUPLED PLASMA (FURTHER DETAIL NOT PROVIDED)		vs NBS951	relative to NBS-951 standard reference material		CRICH	CRICHTONITE
ARMA	armalcolite		ICP:AES	INDUCTIVELY COUPLED PLASMA ATOMIC EMISSION SPECTROSCOPY		vs PDB	relative to PDB (Pee Dee Belemnite)		CRIS	CRISTOBALITE
As	arsenic		ICP:ES	INDUCTIVELY COUPLED PLASMA SOURCE EMISSION SPECTROMETRY		vs SLAP	relative to SLAP (Standard Light Antarctic Precipitation)		CSO	CaSiO3, HIGH PRESSURE
Au	gold		ICP:LA	INDUCTIVELY COUPLED PLASMA LASER ABLATION (FURTHER DETAIL NOT PROVIDED)		vs SMOW	relative to SMOW (Standard Mean Ocean Water)		CST	COESITE
AUG	augite		ICP:LAM	INDUCTIVELY COUPLED PLASMA MASS SPECTROMETRY LASER ABLATION MICROPROBE		wt%	weight percent		CTD	CHLORITOID
AWA	awaruite		ICP:MS	INDUCTIVELY COUPLED PLASMA MASS SPECTROMETRY		years	years		CTI	CaTi(Al2O6)
B	boron		ICP:MS-HR	INDUCTIVELY COUPLED PLASMA MASS SPECTROMETRY HIGH-RESOLUTION					CUB	CUBANITE
B_Ca	ratio of boron to calcium		ICP:MS-ID	INDUCTIVELY COUPLED PLASMA MASS SPECTROMETRY ISOTOPE DILUTION					DI	DIOPSIDE
B11_B10	boron isotope		ICP:MS-LA	INDUCTIVELY COUPLED PLASMA MASS SPECTROMETRY LASER ABLATION					DIA	DIAMOND
Ba	barium		ICP:MS-LA-MC	INDUCTIVELY COUPLED PLASMA MASS SPECTROMETRY LASER ABLATION MULTICOLLECTOR					DOL	DOLOMITE
Ba_Ca	ratio of barium to calcium		ICP:MS-MC	INDUCTIVELY COUPLED PLASMA MASS SPECTROMETRY MULTI-COLLECTOR					ED-HORN	EDENITIC HORNBLENDE
BaO	barium oxide		ICP-OES	OPTICAL EMISSION SPECTROSPCOPY					EDE	EDENITE
BaSO4	barite		ICS	IRIDIUM COINCIDENCE SPECTROMETRY					EN	ENSTATITE
Be	beryllium		IGN	IGNITION					EP	EPIDOTE
Be10	beryllium isotope be10		IMP	ION MICROPROBE					FE-OX	FE-OXIDE
Be10_Be9	ratio of beryllium isotopes be10 to be9		INAA	INSTRUMENTAL NEUTRON ACTIVATION ANALYSIS					FETI-OX	FE-TI OXIDE
Be10_Be9(T)	ratio of isotopes be10 to be 9, time corrected		INC	ION CHROMATOGRAPHY					FPER	FERROPERICLASE
Be9	beryllium isotope be9		IR-SP	INFRA-RED SPECTROSCOPY					FSP	FELDSPAR
Bi	bismuth		ISE	ION SENSITIVE ELECTRODE					GAR	GARNET
BIO	biotite		IVA	INVERSION VOLT-AMPERMETRY					GL	GLASS
Br	bromium		K-AR	K-AR AGE DETERMINATION					GM	GROUNDMASS
BROMIDE	bromide		LAICP	INDUCTIVELY COUPLED PLASMA LASER ABLATION (FURTHER DETAIL NOT PROVIDED)					GM-GL	GLASSY GROUNDMASS
BST	bastite		LA-ICPMS	LASER ABLATION INDUCTIVELY COUPLED PLASMA MASS SPECTROMETRY					GOLD	GOLD
BZT	bronzite		LF	LASER FLUORINATION					GONN	GONNARDITE
C	carbon		LU-HF	LUTETIUM-HAFNIUM AGE DETERMINATION					GRAPH	GRAPHITE
C(INORG)	inorganic carbon		MANO	MANOMETRY					HAUY	HAUYNE
C(ORG)	organic carbon		MBS	MOLYBDATE-BLUE SPECTROMETRY					HEM	HEMATITE
C(TOT)	total carbon		MC-ICP-MS	LASER ABLATION MULTICOLLECTOR INDUCTIVELY COUPLED PLASMA MASS SPECTROMETRY					HERC	HERCYNITE
C_(non-carb)	non-carbonate carbon		MOSS	MOSSBAUER SPECTRA					HEU	HEULANDITE
C_N	ratio of organic carbon to total nitrogen		MS	MASS SPECTROMETRY					HGAR	HYDROGARNET
C14_AGE	c14_age		MS:ID	ISOTOPE DILUTION MASS SPECTROMETRY					HORN	HORNBLENDE
Ca	calcium		MS:SIMS	SECONDARY IONIZATION MASS SPECTROMETRY					HSCHL	HYDROSCHORLOMITE
Ca_K	ratio of calcium to potassium		MS:SS-ID	SPARK SOURCE MASS SPECTROMETRY - ISOTOPE DILUTION					HYGR	HYDROGROSSULAR
CaCO3	calcium carbonate		MS:SSMS	SPARK SOURCE MASS SPECTROMETRY					IDD	IDDINGSITE
CALC	calcite		MS:TIMS	THERMAL IONIZATION MASS SPECTROMETRY					ILL	ILLITE
CALCITE	calcite		MS:TIMS-ID	TIMS ISOTOPE DILUTION					ILM	ILMENITE
CALIBRATED C14_AGE	calibrated c14_age		MS:TIMS-ID-NEG	NEGATIVE THERMAL IONIZATION MASS SPECTROMETRY ISOTOPE DILUTION					INT	INTERSTITIAL
CaO	calcium oxide		MS:TIMS-NEG	NEGATIVE THERMAL IONIZATION MASS SPECTROMETRY					IO	INCLUDED IN OLIVINE
Ca-OL	calcium-olivine		MS-ID	MASS SPECTROMETRY ISOTOPE DILUTION					JD	NaAl(Si2O6)
CAP_DELTA_S33	deviation of delta_s33 from the terrestrial fractionation array, calculated as delta_s33 minus 1000 times ((delta_s34 divided by 1000 then plus one) taken to the 0.515th power) minus 1 or cap_delta_33s=delta_s33-1000×[(delta_s34/1000+1)^0.515-1]		NAA	NEUTRON ACTIVATION ANALYSIS					KAER	KAERSUTITE
CARB	carbonate		NAA-PG	PROMPT-GAMMA NEUTRON ACTIVATION ANALYSIS					KELY	KELYPHITE
CASU	calcium sulfate		NCC	NEUTRON COINCIDENCE COUNTING					KF	K-FELDSPAR
CATS	calcium tschermak molecule		NN	UNKNOWN					KY	KYANITE
CCR	calcium chromium clinopyroxene		NSFA-ID	NICKEL SULFIDE FIRE ASSAY ISOTOPE DILUTION					LAU	LAUMONITE
Cd	cadmium		NTIMS	NEGATIVE THERMAL IONIZATION MASS SPECTROMETRY					LAW	LAWSONITE
Cd_Ca	ratio of cadmium to calcium		NTIMS-ID	NEGATIVE THERMAL IONIZATION MASS SPECTROMETRY ISOTOPE DILUTION					LEU	LEUCITE
Ce	cerium		OES	OPTICAL EMISSION SPECTROMETRY					LHER	LHERZOLITE
Ce136_Ce142	ratio of cerium isotopes ce136 to ce142		OPS	OPTICAL SPECTROSCOPY					MAF	MAFIC MINERALS
Ce138_Ce142	ratio of cerium isotopes ce138 to ce142		PB-PB	PB-PB DATING					MARC	MARCASITE
Ce140_Nd146	ratio of cerium to neodymium isotopes ce140 to nd146		PC	POINT-COUNTING					MGH	MAGHEMITE
Ce2O3	cerium oxide		PEN	PENFIELD METHOD					MICA	MICA
CEL	celadonite		PGNAA	PROMPT-GAMMA NEUTRON ACTIVATION ANALYSIS					MIL	MILLERITE
CEL-NON	celadonite-nontronite		PMP	PROTON MICROPROBE					MNZ	MONAZITE
CEL-NON-SAP	celadonite-nontranite-saponite		POT	POTENTIOMETRY					MONT	MONTMORILLONITE
CELS	celsian		PYHY	PYROHYDROLYSIS					MS	MATNESITE
CH4	methane		RA-TH	RA226_TH230 AGE DETERMINATION					MT	MAGNETITE
CHL/SMEC	chlorite/smectite		RB-SR	RB-SR AGE DETERMINATION					MULL	MULLITE
CHLOR	chlorite		REF	REFRACTOMETER					MUS	MUSCOVITE
CHLORINITY	chlorinity		RE-OS	RHENIUM-OSMIUM AGE DETERMINATION					MYR	MYRMEKITE
CHLORITE	chlorite		REP	ROCK EVAL PYROLYSIS					NAC	NaCr(Si2O6)
CHLOR-SAP	chlorite-saponite		RNAA	RADIOANALYTICAL NEUTRON ACTIVATION					NATR	NATROLITE
CHRG_BAL	electrical charge balance, calculated as the sum of cations vs. anions		RR	RAPID ROCK					NCU	NATIVE COPPER
CHROM	chromite		RSA	RADIO-ISOTOPIC SAMPLE AGE					NE	NEPHELINE
CHRYS	chrysotile		SEM	SCANNING ELECTRON MICROSCOPE					NN	UNKNOWN
Cl	chlorine		SEM-EDS	SEM-ENERGY DISPERSIVE XRAYS					OL	OLIVINE
CLAY	clay		SIMS	SECONDARY ION MASS SPECTROMETRY					OL(R)	OL(R)
CLS	celestine		SMA	SOLID'S MOISTURE ANALYSIS					OLIG	OLIGOCLASE
CLY	clay mineral		SM-ND	SAMARIUM-NEODYMIUM AGE DETERMINATION					OLPS	OLIVINE PSEUDOMORPH
CMG	cummingtonite		SPEC	SPECTROGRAPHIC ANALYSIS					OLXC	OLIVINE XENOCRYST
Co	cobalt		SP-PH	SPECTROPHOTOMETRY					OMPH	OMPHACITE
CO1	carbon monoxide		SS-ID	SPARK SOURCE MASS SPECTROMETRY - ISOTOPE DILUTION					OPQ	OPAQUE MINERAL
CO2	carbon dioxide		SSMS	SPARK SOURCE MASS SPECTROMETRY					OPX	ORTHOPYROXENE
CO2_umol	carbon dioxide measured in micromols		TH_PB	THORIUM-LEAD AGE DETERMINATION					OR	ORTHOCLASE
CoO	cobalt oxide		TIMS	Thermal Ionization Mass Spectrometer					ORE	ORE
COR	corundum		TIMS-ID	THERMAL IONIZATION MASS SPECTROMETRY ISOTOPE DILUTION					OX	OXIDE
CORD	cordierite		TITR	TITRATION					OX-CEL	OXYHYDROXIDE-CELADONITE
CORR	corrensite		U_PA	U235_PA231 AGE DETERMINATION					OX-PHYLL	OXYHYDROXIDE-PHYLLOSILICATE
CPX	clinopyroxene		U_PB	URANIUM LEAD AGE DETERMINATION					PAL	PALAGONITE
CPY	chalcopyrite		U_TH	U238_TH230 AGE DETERMINATION					PARA	PARAGONITE
Cr	chromium		U_TH_HE	U-TH-HE AGE DETERMINATION					PARG	PARGASITE
Cr2O3	chromium oxide		UNKNOWN	UNKNOWN					PECT	PECTOLITE
CRICH	crichtonite		U-PB	URANIUM-LEAD AGE DETERMINATION					PENT	PENTLANDITE
CRIS	cristobalite		UV-ES	ULTRAVIOLET EMISSION SPECTROGRAPHY					PEROV	PEROVSKITE
Cs	cesium		VAC-F	VACUUM FUSION					PGN	PIGEONITE
Cs137_ACTIVITY	cesium isotope cs137 reported as activity		VOL	VOLUMETRIC ANALYSIS					PHE	PHENGITE
CSO	casio3, high pressure		WET	WET CHEMISTRY					PHIL	PHILIPPSITE
CST	coesite		XANES	X-RAY ABSORPTION NEAR-EDGE STRUCTURE SPECTROSCOPY					PHLOG	PHLOGOPITE
CTD	chloritoid		XRD	X-RAY DISPERSIVE SPECTROMETRY					PHYLL	PHYLLOSILICATE
CTI	calcium titanium tschermak molecule		XRF	X-RAY FLUORESCENCE					PL-XC	PLAGIOCLASE XENOCRYST
Cu	copper		XRF-EDS	ENERGY-DISPERSIVE X-RAY FLUORESCENCE					PLAG	PLAGIOCLASE
Cu2O	copper(i) oxide		XRF-SCAN	X-RAY FLUORESCENCE SCANNING					PREH	PREHNITE
CUB	cubanite								PSB	PSEUDOBROOKITE
CuO	copper oxide								PUMP	PUMPELLYITE
DELTA_B11	equals: (ratio of boron isotopes b11/b10 in the sample divided by ratio of b11/b10 in reference material srm951) minus 1, multiplied by 1000								PX	PYROXENE (NOT CLASSIFIED)
DELTA_C13	equals: (ratio of carbon isotopes c13/c12 in the sample divided by ratio of c13/c12 of the pee dee belemnite) minus 1, multiplied by 1000								PY	PYRITE
DELTA_Ca44	equals :(ratio of 44ca to 40ca sample) divided by (ratio of 44ca std to 40ca std) minus 1, multplied by 1000								PYRH	PYRRHOTITE
DELTA_Cl37	equals: (ratio of chlorine isotopes cl37/cl35 in the sample divided by ratio of cl37/cl35 of the standard mean ocean chlorine) minus 1, multiplied by 1000								PYRPH	PYROPHYLLITE
DELTA_D	equals: (ratio of hydrogen isotopes h2/h1 in the sample divided by ratio of h2/h1 in reference material ) minus 1, multiplied by 1000								QZ	QUARTZ
DELTA_Fe56	equals: (ratio of iron isotopes fe56/fe54 in the sample divided by ratio of fe56/fe54 of irmm-014) minus 1, multiplied by 1000								RHO	RHONITE
DELTA_Fe57	equals: (ratio of iron isotopes fe57/fe54 in the sample divided by ratio of fe57/fe54 of irmm-014) minus 1, multiplied by 1000								RUT	RUTILE
DELTA_Li6	equals: (ratio of lithium isotopes li6/li7 in the sample divided by ratio of li6/li7 of the standard) minus 1, multiplied by 1000								SAP	SAPONITE
DELTA_Li7	equals: (ratio of lithium isotopes li7/li6 in the sample divided by ratio of li7/li6 of the standard) minus 1, multiplied by 1000								SAP-FE-OX	SAPONITE-IRON-OXIDE
DELTA_Mg25	equals: (ratio of magnesium isotopes mg25/mg24 in the sample divided by ratio of mg25/mg24 in the reference material) minus 1, multiplied by 1000								SAP-GA	SAPONITE-GLAUCONITE
DELTA_Mg26	equals: (ratio of magnesium isotopes mg26/mg24 in the sample divided by ratio of mg26/mg24 in the reference material) minus 1, multiplied by 1000								SCAP	SCAPOLITE
DELTA_N15	equals: (ratio of nitrogen isotopes n15/n14 in the sample divided by ratio of n15/n14 in the reference material) minus 1, multiplied by 1000								SERP	SERPENTINE
DELTA_O18	equals: (ratio of oxygen isotopes o18/o16 in the sample divided by ratio of o18/o16 of the standard) minus 1, multiplied by 1000								SIL	SILICATE
DELTA_S33	equals: (ratio of sulfur isotopes s33/s32 in the sample divided by ratio of s33/s32 in the reference material) minus 1, multiplied by 1000								SILM	SILLIMANITE
DELTA_S34	equals: (ratio of sulphur isotopes s34/s32 in the sample divided by ratio of s34/s32 in reference material ) minus 1, multiplied by 1000								SIOH	SiO2, HIGH PRESSURE
DELTA_S34SO4	sulfur isotope of the sulfate. equals: (ratio of sulphur isotopes s34/s32 in the sample divided by ratio of s34/s32 in reference material ) minus 1, multiplied by 1000								SLFA	SULFATE
DELTA_U234	equals: (ratio of uranium isotopes u234/u238 in the sample divided by ratio of u234/u238 in the secular equilibrium) minus 1, multiplied by 1000								SLFI	SULFIDE
DELTA_Zn66	equals :(ratio of 66zn to 64zn sample) divided by (ratio of 66zn std to 64zn std) minus 1, multplied by 1000								SMEC	SMECTITE
DI	diopside								SMEC-CEL	SMECTITE-CELADONITE
DIA	diamond								SND	SANIDINE
DIC	dissolved inorganic carbon								SODA	SODALITE
DOL	dolomite								SP	SPINEL
Dy	dysprosium								SPH	SPHENE
Dy2O3	dysprosium oxide								SPHL	SPHALERITE
E_Cd	epsilon 114/110cadmium								SS	SHEET SILICATE
E_Ce	epsilon ce = [(138ce/142ce)sample/(138ce/142ce)chur - 1]x10e4								SULF	SULF
E_Hf	epsilon hf = [(176hf/177hf)sample/(176hf/177hf)chur - 1]x10e4								SYMP	SYMPLECTITE
E_Hf(T)	epsilon hf = [(176hf/177hf)sample/(176hf/177hf)chur - 1]x10e4, time corrected								SYMT	SYMTHITE
E_Nd	epsilon nd = [(nd143/nd144)sample/(nd143/nd144)reference - 1]x10e4								TALC	TALC
E_Nd(JUV)	epsilon nd(juv) = [(nd143/nd144)sample/(nd143/nd144)juv - 1]x10e4, where juv is juvinas achondrite								THOM	THOMSONITE
E_Nd(T)	epsilon nd = [(nd143/nd144)sample/(nd143/nd144)reference - 1]x10e4, time corrected								TI-MT	TI-MAGNETITE
E_Sr	epsilon sr= [(sr87/sr86)sample/(sr87/sr86)reference - 1]x10e4								TI-NB	TITANONIOBATE
E_Sr(T)	epsilon sr= [(sr87/sr86)sample/(sr87/sr86)reference - 1]x10e4, time corrected								TREM	TREMOLITE
E_Tl205	epsilon thallium isotope 205								TREV	TREVORITE
EDE	edenite								TRI	TRIDYMITE
ED-HORN	edenitic hornblende								TRO	TROILITE
EN	enstatite								ULSP	ULVOSPINEL
EP	epidote								VES	VESICLES
Er	erbium								VES-F	FILLED VESICLE
Eu	europium								YMG	YIMENGITE
F	fluorine								ZEOL	ZEOLITE
FA	fayalite								ZIRC	ZIRCON
Fe	iron								ZOI	ZOISITE
Fe2O3	ferric iron oxide (tri-valent iron)
Fe2O3T	total iron oxide content reported as ferric (tri-valent) iron
Fe3_SUMFe	ratio of fe3+ to total fe
Fe3O4
Fe3P_FeT	feric iron total iron ratio
FeCO3	siderite
Fe-Fe	iron ferrite = fefe2o4
FeO	ferrous iron oxide (di-valent)
FE-ORE	iron ore
FeOT	total iron oxide content reported as ferrous (di-valent) iron
FE-OX	fe-oxide
FeS2	iron sulfide
FETI-OX	iron titanium oxide
FO	forsterite
FORMATE	formate
FPER	ferropericlase
FS	ferrosilite
FSP	feldspar
G_Os	gamma osmium
G_Os(T)	gamma osmium, time corrected
Ga	gallium
GAL	galaxite = mnal2o4
GAR	garnet
Gd	gadolinium
Gd2O3	gadolinium oxide
Ge	germanium
GKL	geikilite
GL	glass
GM	groundmass
GM-GL	glassy groundmass
GOLD	gold
GONN	gonnardite
GPH	graphite
GRAPH	graphite
GROS	grossular
H	hydrogen
H(TOT)	total hydrogen
H2	hydrogen
H2O	water
H2OM	crystal water (h2o-)
H2OP	crystal water (h2o+)
H2S	hydrogen sulfide
H2S(TOT)	total sulfide
H4SiO4	silicic acid
HALITE	halite
HAUS	hausmannite
HAUY	hauyne
HCO3	bicarbonate
HCY	hercynite
He	helium
He3	helium isotope he3
He3_He4	ratio of helium isotopes he3 to he4
He3_He4(R/Ra)	ratio of helium isotopes he3 to he4 expressed relative to the helium isotope ratio of the atmosphere
He4	helium isotope he4
He4(NCC)	helium isotope he4 measured by neutron coincidence counting
He4_Ar40	ratio of helium isotope he4 to argon isotope ar40
He4_He3	ratio of helium isotopes he4 to he3
He4_Ne20	ratio of helium isotope he4 to neon isotope ne20
He4_Ne21	ratio of helium isotope he4 to neon isotope ne21
HEDN	hedenbergite
HEM	hematite
HERC	hercynite
HEU	heulandite
Hf	hafnium
Hf176_Hf177	ratio of hafnium isotopes hf176 to hf177
Hf176_Hf177(I)	ratio of hafnium isotopes hf176 to hf177 at initial time
Hf176_Hf177(T)	ratio of hafnium isotopes hf176 to hf177, time corrected
Hf177_Hf178	ratio of hafnium isotopes hf177 to hf178
Hf178_Hf177	ratio of hafnium isotopes hf178 to hf177
Hf179_Hf177	ratio of hafnium isotopes hf179 to hf177
Hf180_Hf177	ratio of hafnium isotopes hf180 to hf177
HfO2	hafnium oxide
Hg	mercury
HGAR	hydrogarnet
Ho	holmium
HORN	hornblende
HSCHL	hydroschorlomite
HYGR	hydrogrossular
I	iodine
IDD	iddingsite
ILL	illite
ILM	ilmenite
In	indium
INT	interstitial
IO	included in olivine
Ir	iridium
JAC	jacobsite
JD	jadeite
K	potassium
K2O	potassium oxide
KAER	kaersutite
KAOLINITE	kaolinite
KELY	kelyphite
KF	potassium feldspar
Kr	krypton
Kr78	krypton isotope kr78
Kr78_Kr84	ratio of krypton isotopes kr78 to kr84
Kr80	krypton isotope kr80
Kr80_Kr84	ratio of krypton isotopes kr80 to kr84
Kr82	krypton isotope kr82
Kr82_Kr84	ratio of krypton isotopes kr82 to kr84
Kr83	krypton isotope kr83
Kr83_Kr84	ratio of krypton isotopes kr83 to kr84
Kr84	krypton isotope kr84
Kr86	krypton isotope kr86
Kr86_Kr84	ratio of krypton isotopes kr86 to kr84
Kr90	krypton isotope kr90
KS	kalsilite
KY	kyanite
La	lanthanum
La2O3	lanthanum oxide
LAU	laumonite
LAW	lawsonite
LEU	leucite
LHER	lherzolite
Li	lithium
Li7_Li6	ratio of litium isotopes li7 toli6
LOI	loss on ignition
Lu	lutetium
Lu176_Hf177	ratio of lutetium isotope lu176 to hafnium isotope hf177
Lu176_Hf177(T)	ratio of lutetium isotope lu176 to hafnium isotope hf177, time corrected
Lu176_Lu177	ratio of lutetium isotopes lu176 to lu177
LW	lawsonite
MAF	mafic minerals
MARC	marcasite
Mg	magnesium
Mg_Ca	ratio of magnesium to calcium
MgCO3	magnesium carbonate
MGCR	magnesiochromite
MGF	mg-ferrite
MGH	maghemite
MgO	magnesium oxide
MICA	mica
MIL	millerite
Mn	manganese
Mn_Ca	ratio of manganese to calcium
Mn3O4	manganese tetroxide
MnCO3	manganese carbonate
MNCR	manganese chromite
MnO	manganese oxide
Mn-OL	manganese olivine
MNZ	monazite
Mo	molybdenum
MONT	montmorillonite
MS	matnesite
MT	magnetite
MULL	mullite
MUS	muscovite
MYR	myrmekite
N	nitrogen
N(A)	percent nitrogen in the a defect site of diamonds
N(B)	percent nitrogen in the b defect site of diamonds
N(ORG)	organic nitrogen
N(TOT)	total nitrogen
N2	nitrogen
N2[nmol]	nitrogen measured in nanomols
N2_Ar36	ratio of nitrogen isotope n2 to argon isotope ar36
N2_He3	ratio of nitrogen isotope n2 to helium isotope he3
Na	sodium
Na2O	sodium oxide
NAC	clinopyroxene end-member nacr (si2o6)
NATR	natrolite
Nb	niobium
Nb2O3	niobium oxide
Nb2O5	niobium pentoxide
NCU	native copper
Nd	neodymium
Nd_Ca	ratio of neodymium to calcium
Nd142_Nd144	ratio of neodymium isotopes nd142 to nd144
Nd143_Nd144	ratio of neodymium isotopes nd143 to nd144
Nd143_Nd144(I)	ratio of neodymium isotopes nd143 to nd144 at initial age
Nd143_Nd144(T)	ratio of neodymium isotopes nd143 to nd144, time corrected
Nd144_Nd146	ratio of neodymium isotopes nd144 to nd146
Nd145_Nd144	ratio of neodymium isotopes nd145 to nd144
Nd146_Nd142	ratio of neodymium isotopes nd146 to nd142
Nd146_Nd144	ratio of neodymium isotopes nd146 to nd144
Nd146_Nd145	ratio of neodymium isotopes nd146 to nd145
Nd148_Nd144	ratio of neodymium isotopes nd148 to nd144
Nd148O_Nd144O	ratio of neodymium nd148 oxide to neodymium nd144 oxide
Nd150_Nd144	ratio of neodymium isotopes nd150 to nd144
Nd2O3	neodymium oxide
Ne	neon
Ne20	neon isotope ne20
Ne20_Ne22	ratio of neon isotope ne20 to ne22
Ne21	neon isotope ne21
Ne21_He4	ratio of neon isotope ne21 to helium isotope he4
Ne21_Ne20	ratio of neon isotope ne21 to ne20
Ne21_Ne22	ratio of neon isotope ne21 to ne22
Ne22	neon isotope ne22
Ne22_Ne20	ratio of neon isotope ne22 to ne20
Ne23	neon isotope ne23
NH3	ammonia
NH4	ammonium
Ni	nickel
NiO	nickel oxide
NN	unknown
NO2	nitrite
NO3	nitrate
O	oxygen
O2	dioxygen
OH	hydroxide
OL	olivine
OL(R)	ol(r)
OLIG	oligoclase
OLPS	olivine pseudomorph
OLXC	olivine xenocryst
OMPH	omphacite
OPAL	opal
OPAQ	opaque mineral
OPQ	opaque mineral
OPX	orthopyroxene
OR	orthoclase
ORE	ore
Os	osmium
Os(I)	common osmium at initial age
Os184_Os188	ratio of osmium isotopes os184 to os188
Os186_Os188	ratio of osmium isotopes os186 to os188
Os187_Os186	ratio of osmium isotopes os187 to os186
Os187_Os188	ratio of osmium isotopes os187 to os188
Os187_Os188(I)	ratio of osmium isotopes os187 to os188 at initial age
Os187_Os188(T)	ratio of osmium isotopes os187 to os188, time corrected
Os188	osmium isotope os188
Os188_Os192	ratio of osmium isotopes os188 to os192
Os189_Os188	ratio of osmium isotopes os189 to os188
Os190_Os188	ratio of osmium isotopes os190 to os188
Os192_Os188	ratio of osmium isotopes os192 to os188
OX	oxide
OX-CEL	oxyhydroxide-celadonite
OX-PHYLL	oxyhydroxide-phyllosilicate
P	phosphorus
P(ORG)	phosphorous, organic
P2O5	phosphorus oxide
Pa	protactinium
Pa231	protactinium isotope pa231
Pa231_ACTIVITY	protactinium isotope pa231, reported as activity
Pa231_Th230	ratio of protactinium 231 to thorium 230
Pa231_U235_ACTIVITY	ratio of protactinium isotope pa231 to uranium isotope u235, reported as activity
Pa231_XS	excess protactinium 231
PAL	palagonite
PARA	paragonite
PARG	pargasite
Pb	lead
Pb204	lead isotope pb204
Pb204_Pb206	ratio of lead isotopes pb204 to pb206
Pb206	lead isotope 206
Pb206_Pb204	ratio of lead isotopes pb206 to pb204
Pb206_Pb204(I)	ratio of lead isotopes pb206 to pb204 at initial age
Pb206_Pb204(T)	ratio of lead isotopes pb206 to pb204, time corrected
Pb206_Pb207	ratio of lead isotopes pb206 to pb207
Pb206_Pb208	ratio of lead isotopes pb206 to pb208
Pb206_U235	ratio of lead isotope pb206 to uranium isotope u235
Pb206_U238	ratio of lead isotope pb206 to uranium isotope u238
Pb207_Pb204	ratio of lead isotopes pb207 to pb204
Pb207_Pb204(I)	initial pb207_pb204 ratio (age-corrected)
Pb207_Pb204(T)	ratio of lead isotopes pb207 to pb204, time corrected
Pb207_Pb206	ratio of lead isotopes pb207 to pb206
Pb207_Pb206(I)	ratio of lead isotopes pb207 to pb206 at initial age
Pb207_U235	ratio of lead isotope pb207 to uranium isotope u235
Pb208_Pb204	ratio of lead isotopes pb208 to pb204
Pb208_Pb204(I)	ratio of lead isotopes pb208 to pb204 at initial age
Pb208_Pb204(T)	ratio of lead isotopes pb208 to pb204, time corrected
Pb208_Pb206	ratio of lead isotopes pb208 to pb206
Pb208_Pb206(I)	ratio of lead isotopes pb208 to pb206 at initial age
Pb208_Th232	ratio of lead isotope pb208 to thorium isotope th232
Pb210	lead isotope pb210
Pb210_ACTIVITY	lead isotope pb210, reported as activity
Pb210_Ra226	ratio of lead isotope pb210 to radium isotope ra226
Pb210_U238	ratio of lead isotope pb210 to uranium isotope u238
Pb210_XS	excess lead 210
Pd	palladium
PECT	pectolite
PENT	pentlandite
PEROV	perovskite
PGN	pigeonite
pH	pH
PHEN	phengite
PHIL	philippsite
PHLOG	phlogopite
PHYLL	phyllosilicate
PI	physical item
PLAG	plagioclase
PLEO	pleonaste
PL-XC	plagioclase xenocryst
Po210	polonium isotope Po210
Po210_ACTIVITY	polonium isotope po210, reported as activity
Po210_Pb210	ratio of polonium isotope 210 to lead isotope 210
PO4	phosphate
Pr	praseodymium
PREH	prehnite
PRESS	pressure
PSB	pseudobrookite
Pt	platinum
Pt190_Os188	ratio of platinum isotope pt190 to osmium isotope os188
PUMP	pumpellyite
PX	pyroxene (not classified)
PY	pyrite
PYPH	pyrophanite
PYR	pyrope
PYRH	pyrrhotite
PYRPH	pyrophyllite
QUARTZ	quartz
QZ	quartz
r2	the correlation coefficient used to calculate the best-fit line through ambient seawater and the concentration of a given chemical species measured in the samples, plotted against Mg
Ra	radium
Ra226	radium isotope ra226
Ra226_ACTIVITY	radium 226, reported as activity
Ra226_Th230	ratio of radium isotope 226 to thorium isotope 230
Ra226_Th230_ACTIVITY	ratio of radium isotope 226 to thorium isotope 230, reported as activity
Rb	rubidium
Rb87_Sr86	ratio of rubidium isotope rb87 to strontium isotope sr86
Re	rhenium
Re187_Os186	ratio of rhenium isotope re187 to osmium isotope os186
Re187_Os188	ratio of rhenium isotope re187 to osmium isotope os188
Rh	rhodium
RHO	rhonite
Ru	ruthenium
RUT	rutile
S	sulfur
S(TOT)	total sulfur
S_(SLFI)	sulfur present as sulfide
S_PY	sulfur present in pyrite form
SAL	salinity
SAP	saponite
SAP-FE-OX	saponite-iron-oxide
SAP-GA	saponite-glauconite
Sb	antimony
Sc	scandium
Sc2O3	scandium oxide
SCAP	scapolite
Se	selenium
SERP	serpentine
Si	silica
Si(AMORPH)	amorphous silica
SID	sideromelane
SIL	silicate
SILM	sillimanite
SiO2	silica oxide
SIOH	sio2, high pressure
SLFA	sulfate
SLFI	sulfide
Sm	samarium
Sm147_Nd143	ratio of samarium isotope sm147 to neodymium isotope nd143
Sm147_Nd144	ration of samarium isotope sm147 to neodymium isotope nd144
Sm147_Nd146	ratio of samarium to neodymium isotopes sm147 to nd146
Sm2O3	samarium oxide
SMEC	smectite
SMEC-CEL	smectite-celadonite
Sn	tin
SND	sanidine
SO2	sulfur dioxide
SO3	sulfur trioxide
SO4	sulfate
SODA	sodalite
SP	spinel
SPES	spessartine
SPH	sphene
SPHL	sphalerite
Sr	strontium
Sr_Ca	ratio of sr to ca
Sr84_Sr86	ratio of strontium isotopes sr84 to sr86
Sr84_Sr88	ratio of strontium isotopes sr84 to sr88
Sr86_Sr88	ratio of strontium isotopes sr86 to sr88
Sr87_Sr86	ratio of strontium isotopes sr87 to sr86
Sr87_Sr86(I)	ratio of strontium isotopes sr87 to sr86 at initial age
Sr87_Sr86(T)	ratio of strontium isotopes sr87 to sr86, time corrected
Sr87_Sr88	ratio of strontium isotopes sr87 to sr88
Sr88_Sr86	ratio of strontium isotopes sr88 to sr86
SrO	strontium oxide
SS	sheet silicate
SYMP	symplectite
SYMT	symthite
Ta	tantalum
Ta2O5	tantalum oxide
TACH	tachylite
TALC	talc
Tb	terbium
Te	tellurium
TEMP	temperature
Th	thorium
Th227_ACTIVITY	th227 reported as activity
Th228_Th232	ratio of thorium isotopes th228 to th232
Th230	thorium isotope th230
Th230_ACTIVITY	thorium isotope th230, reported as activity
Th230_Th232	ratio of thorium isotopes th230 to th232
Th230_Th232_ACTIVITY	ratio of thorium isotopes th230 to th232, reported as activity
Th230_U238	ratio of thorium isotope th230 to uranium isotope u238
Th230_U238_ACTIVITY	ratio of thorium isotope th230 to uranium isotope u238, reported as activity
Th230_XS	excess thorium 230
Th232	thorium 232
Th232_ACTIVITY	thorium isotope th232, reported as activity
Th232_Pb204	ratio of thorium isotope th232 to lead isotope pb204
Th232_Th230	ratio of isotopes th232 to th230
Th232_Th230 ACTIVITY	ratio of isotopes th232 to th230 measured as activity
Th232_U238	ratio of thorium isotope th232 to uranium isotope u238
Th234	thorium 234
Th234_XS	thorium 234 excess
Th238_Th232_ACTIVITY	ratio of thorium isotopes th238 to th232, reported as activity
ThO	thorium oxide
ThO2	thorium oxide
THOM	thomsonite
Ti	titanium
TIC	total inorganic carbon
TI-MT	ti-magnetite
TI-NB	titanoniobate
TiO2	titanium oxide
Tl	thallium
Tl205_Tl203	ratio of thallium isotopes tl205 to tl203
Tm	thulium
TOC	total organic carbon
TREM	tremolite
TREV	trevorite
TRI	tridymite
TRO	troilite
U	uranium
U234	uranium 234
U234_ACTIVITY	uranium isotope u234, reported as activity
U234_U238	ratio of uranium isotopes u234 to u238
U234_U238 ACTIVITY	ratio of isotopes u234 to u235 measured as activity
U234_U238 ACTIVITY(T)	uranium 234 to uranium 238 measured as activity at time t
U234_U238_ACTIVITY	ratio of uranium isotopes u234 to u238, reported as activity
U235_Pb204	ratio of uranium isotope u235 to lead isotope pb204
U235_U234	ratio of isotopes u235 to u234
U238	uranium 238
U238_ACTIVITY	uranium isotope u238, reported as activity
U238_Pb204	ratio of uranium isotope u238 to lead isotope pb204
U238_Pb206	ratio of uranium isotope u238 to lead isotope pb206
U238_Th230	ratio of uranium isotope u238 to thorium isotope th230
U238_Th232	ratio of uranium isotope u238 to thorium isotope th232
U238_Th232_ACTIVITY	ratio of uranium isotope u238 to thorium isotope th232, reported as activity
UK'37	alkenone uk'37
ULSP	ulvospinel
UO2	uranium oxide
UVR	uvarovite
V	vanadium
V2O3	vanadium sesquioxide
V2O5	vanadium pentoxide
VES	vesicles
VES-F	filled vesicle
W	tungsten
WO	wollastonite
WO3	tungsten trioxide
Xe	xenon
Xe124	xenon isotope xe124
Xe124_Xe130	ratio of xenon isotopes xe124 to xe130
Xe124_Xe132	ratio of xenon isotopes xe124 to xe132
Xe126	xenon isotope xe126
Xe126_Xe130	ratio of xenon isotopes xe126 to xe130
Xe126_Xe132	ratio of xenon isotopes xe126 to xe132
Xe128	xenon isotope xe128
Xe128_Xe130	ratio of xenon isotopes xe128 to xe130
Xe128_Xe132	ratio of xenon isotopes xe128 to xe132
Xe129	xenon isotope xe129
Xe129_Xe130	ratio of xenon isotopes xe129 to xe130
Xe129_Xe132	ratio of xenon isotopes xe129 to xe132
Xe129_Xe136	ratio of xenon isotopes xe129 to xe136
Xe130	xenon isotope xe130
Xe130_Xe132	ratio of xenon isotopes xe130 to xe132
Xe131	xenon isotope xe131
Xe131_Xe130	ratio of xenon isotopes xe131 to xe130
Xe131_Xe132	ratio of xenon isotopes xe131 to xe132
Xe132	xenon isotope xe132
Xe132_Xe130	ratio of xenon isotopes xe132 to xe130
Xe134	xenon isotope xe134
Xe134_Xe130	ratio of xenon isotopes xe134 to xe130
Xe134_Xe132	ratio of xenon isotopes xe134 to xe132
Xe136	xenon isotope xe136
Xe136_He4	ratio of xenon isotope xe136 to helium isotope he4
Xe136_Xe130	ratio of xenon isotopes xe136 to xe130
Xe136_Xe132	ratio of xenon isotopes xe136 to xe132
Y	yttrium
Y2O3	yttrium oxide
Yb	ytterbium
Yb176_Hf177	ratio of ytterbium isotope yb176 to hafnium isotope hf177
YMG	yimengite
ZEOL	zeolite
ZIRC	zircon
Zn	zinc
ZnO	zinc oxide
ZO	zoisite
ZOI	zoisite
Zr	zirconium
Zr2O3	zirconium pentoxide
ZrO2	zirconium oxide
